# Supplementary material
Source: PubMed Central journal article supplement (PMC2781401)

## SUPPLEMENTAL DATA

### SUPPLEMENTAL FIGURE LEGENDS

Fig. S1. **MS/MS spectrum of a phosphopeptide pTPSISPVR.**  $\delta$ -Catenin was enriched by immunoprecipitation with lysates from  $\delta$ -catenin overexpressing GSK-3 $\beta$   $+/+$  fibroblast. The gel fraction corresponding to  $\delta$ -catenin separated on SDS-PAGE was digested by trypsin. Phosphopeptides from tryptic peptides are enriched by TiO<sub>2</sub> method and analyzed by LC-MS/MS. The series of y ions corresponding to a pTPSISPVR peptide are shown.

SUPPLEMENTAL FIGURE S1.

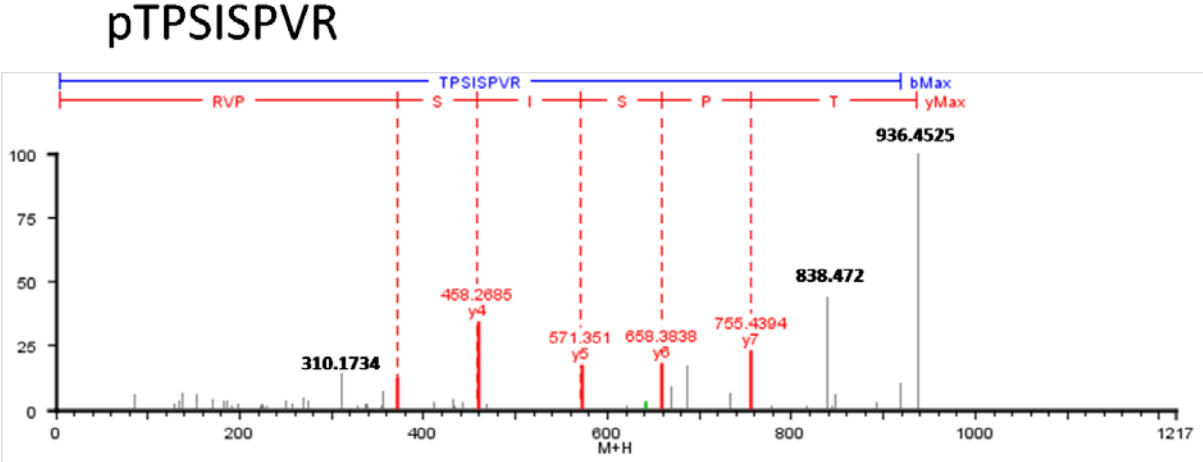

Supplement: supp_M109.002659_jbc.M109.002659-1.pdf [file supp_M109.002659_jbc.M109.002659-1.pdf]
